# Supplementary material for: Casein phosphopeptide combined with fluoride enhances the inhibitory effect on initial adhesion of Streptococcus mutans to the saliva-coated hydroxyapatite disc
Source: Springer Nature journal article supplement (doi:10.1186/s12903-020-01158-8), 2020-06-12
Supplement: MOESM1 [file 18078314]

## Methods

The amount of proteins/peptides adsorbed onto the HA disc before and after pellicle formation and modification was measured according to a previously described method [1]. Twelve HA discs were individually placed into the wells of 24-well plates and randomly divided into four groups (n = 3 per group): blank control, negative control, CPP, and CPP + F groups. The native HA disc (n = 3) incubated with a volume of 1 mL of PBS was used as the blank control group. In the negative control, CPP, and CPP + F groups, s-HA discs were performed as described in the main manuscript. After rinsing twice with sterile PBS, the s-HA discs were incubated with 1 mL of PBS (negative control), 2.5% CPP (CPP) or 2.5% CPP supplemented with 900 ppm fluoride (CPP + F) for 2 h at 37 °C. After rinsing twice with PBS, all the HA discs were transferred to a 48-well plate individually, and treated with 200 µL of micro-bicinchoninic acid (Micro BCA™ Protein Assay Kit, Thermo Scientific, USA) to react with the adsorbed proteins/peptides at 37 °C for 30 min. The optical density of the supernatant at 562 nm (OD<sub>562nm</sub>) was measured using a micro-plate reader (Epoch; BioTek Instruments, VT, USA). Experiments were performed three times in triplicate.

## Results

### Pellicle formation and modification by CPP and fluoride-doped CPP

As shown in the Supplementary Figure below, the amount of adsorbed proteins/peptides was significantly higher in the negative control ( $0.20 \pm 0.01$ ,  $p < 0.05$ ), CPP ( $0.77 \pm 0.04$ ,  $p < 0.0001$ ) and CPP + F ( $0.77 \pm 0.04$ ,  $p < 0.0001$ ) groups

than in the blank control group ( $0.15 \pm 0.00$ ). Both CPP and CPP + F groups showed significantly higher proteins/peptides amounts than the negative control group ( $p < 0.0001$ ), whereas there was no significant difference between the CPP and CPP + F groups.

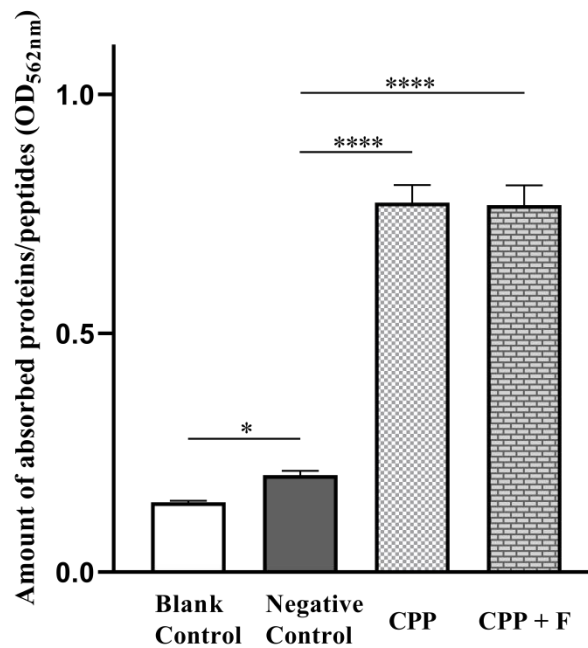

Supplementary Figure

\* $p < 0.05$ , \*\*\*\* $p < 0.0001$ .

## References:

1. Kwon JS, Lee MJ, Kim JY, Kim D, Ryu JH, Jang S, Kim KM, Hwang CJ, Choi SH. Novel anti-biofouling light-curable fluoride varnish containing 2-methacryloyloxyethyl phosphorylcholine to prevent enamel demineralization. *Sci Rep.* 2019;9:1432.
